# Supplementary material
Source: MDPI journal article supplement (https://www.mdpi.com/2673-4583/6/1/11)
Supplement: s1 [file s1]

# Comparative investigation of (10%Co+0.5%Pd)/TiO<sub>2</sub> (Al<sub>2</sub>O<sub>3</sub>) catalysts in CO hydrogenation at low and high pressure

M. Shopska<sup>1</sup>, A. Caballero<sup>2</sup>, S. Todorova<sup>1</sup>, K. Aleksieva<sup>1</sup>, K. Tenchev<sup>1</sup>, H. Kolev<sup>1</sup>, M. Fabian<sup>3</sup>, G. Kadinov<sup>1</sup>

<sup>1</sup>Institute of Catalysis, Bulgarian Academy of Sciences, Sofia, Bulgaria, *E-mail: shopska@ic.bas.bg*; <sup>2</sup>Inorganic Chemistry Department, Materials Science Institute (CSIC-US), Seville, Spain; <sup>3</sup>Institute of Geotechnics, Slovak Academy of Sciences, Kosice, Slovakia

**OBJECT and AIM:** properties of the (10%Co+0.5%Pd)/TiO<sub>2</sub>(Al<sub>2</sub>O<sub>3</sub>) system surface and selectivity in CO hydrogenation at low and high pressure; information about the reasons and ways of product distribution change. **PRETREATMENT:** reduction in H<sub>2</sub>. **METHODS:** chemisorption of H<sub>2</sub> and CO, EPR, XPS, TPD, in situ DRIFTS, catalytic measurements, PCCS.

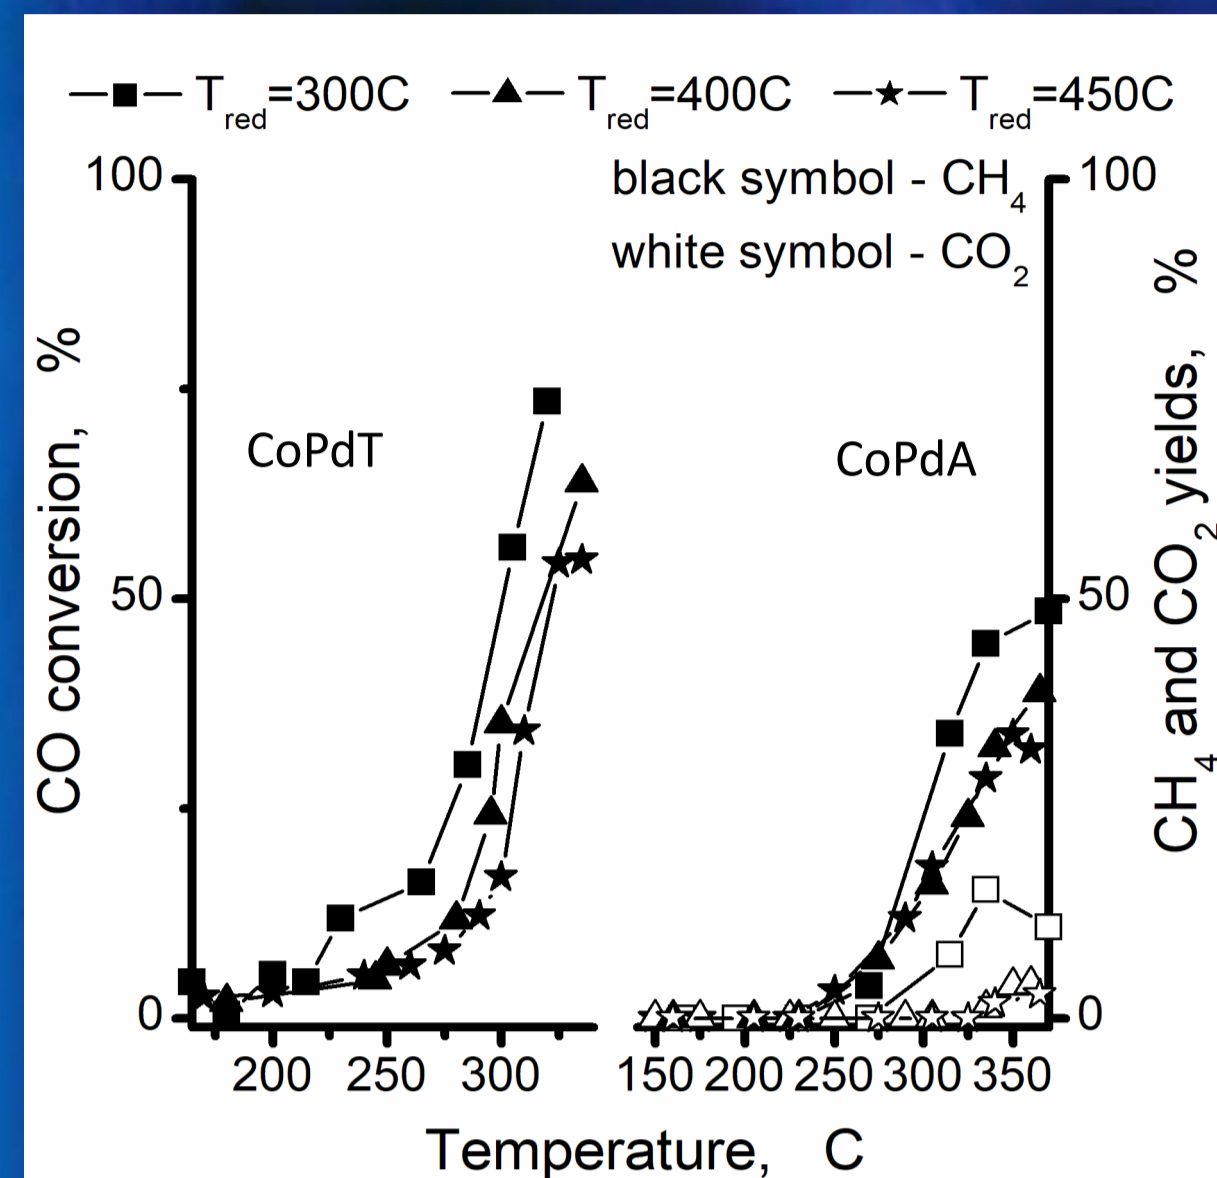

**Increase of T<sub>red</sub> > 300 °C** - decrease in CO conversion and yields of CH<sub>4</sub> and CO<sub>2</sub>. **Increase of T<sub>reac</sub>** - increase of CO conversion and CH<sub>4</sub> and CO<sub>2</sub> amounts and decrease of CH<sub>4</sub>/CO<sub>2</sub> selectivity ratio. CH<sub>4</sub>/CO<sub>2</sub>=2-19 with T<sub>reac</sub>=285-335 °C for TiO<sub>2</sub> supported samples. CH<sub>4</sub>/CO<sub>2</sub>=3-24 in the interval T<sub>reac</sub>=315-365 °C for Al<sub>2</sub>O<sub>3</sub> supported samples.

WGS - favoured by temperature to a significant extent.

**Samples with TiO<sub>2</sub> - more active (best activity after T<sub>red</sub>=300 °C).**

**Samples with Al<sub>2</sub>O<sub>3</sub> - poor activity; higher selectivity to CH<sub>4</sub> (after T<sub>red</sub>=400 °C).**

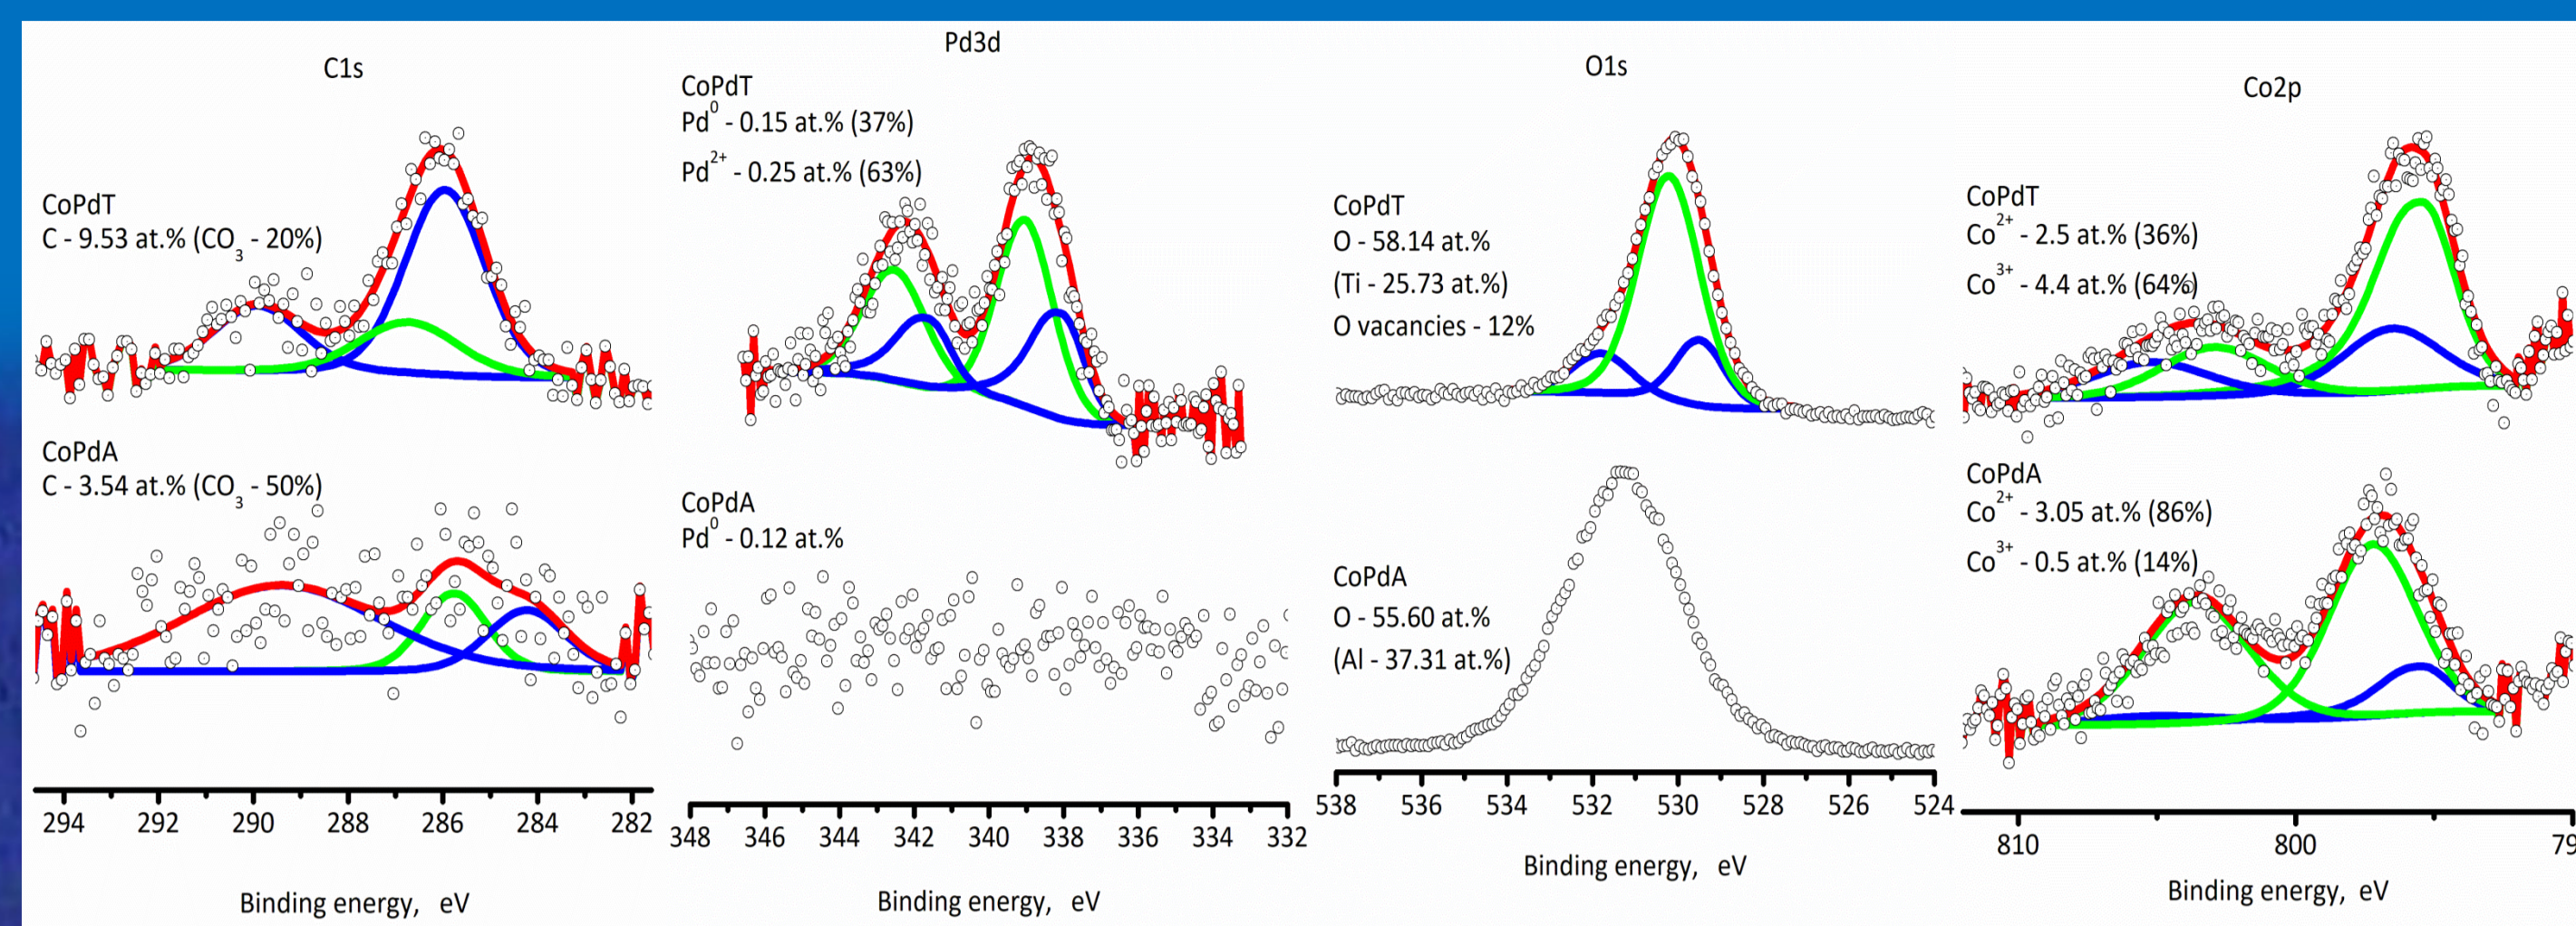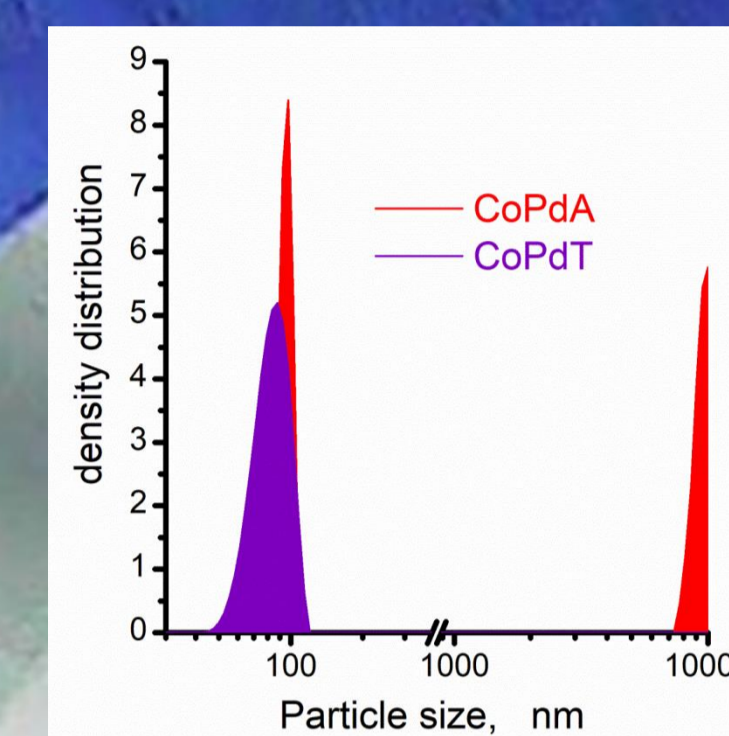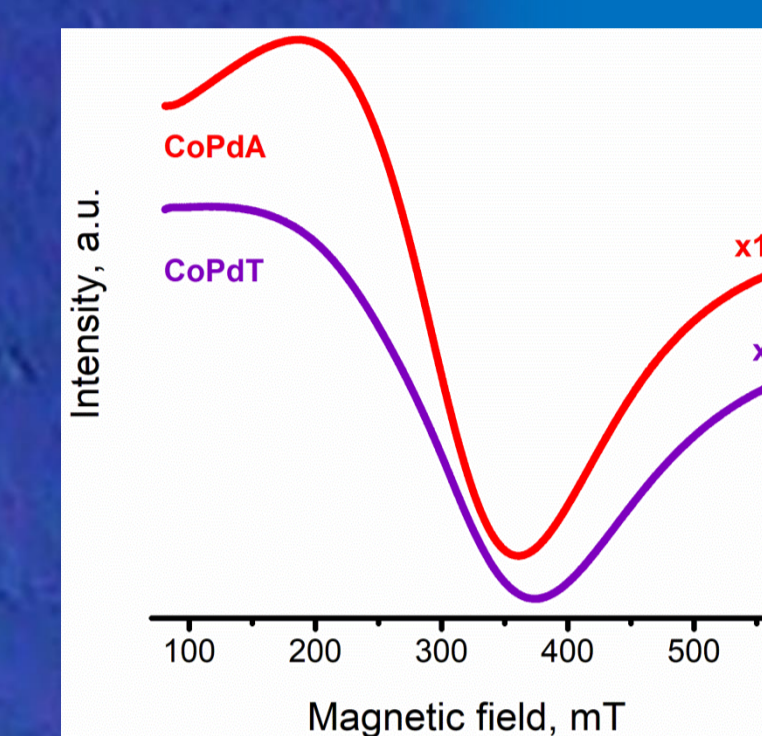

All CoPdT catalyst particles are of 40-120-nm size. CoPdA catalyst has bimodal distribution: 90-102 nm (58%) and 7500-10000 nm (42%). **Agglomerated state.**

**Co<sup>2+</sup> ions;** CoPdT > CoPdA; CoPdA has large amount of cobalt in diamagnetic state as Co, CoPd alloy particles and/or Co<sup>3+</sup>.

## CONCLUSIONS

**Al<sub>2</sub>O<sub>3</sub>-supported Co-Pd catalysts pretreated in H<sub>2</sub> were more selective toward CH<sub>4</sub> and produced a lower CO<sub>2</sub> amount during CO hydrogenation at 1 atm compared to catalysts with TiO<sub>2</sub>. This tendency was preserved at 10 atm due to SMSI (CoPdT), which was not reduced by contact with H<sub>2</sub>O and air determining sites for carbonate species formation and CO<sub>2</sub> production. CoPdT produced less C<sub>5+</sub> because of stable adsorption of C<sub>x</sub>H<sub>y</sub> intermediates.**

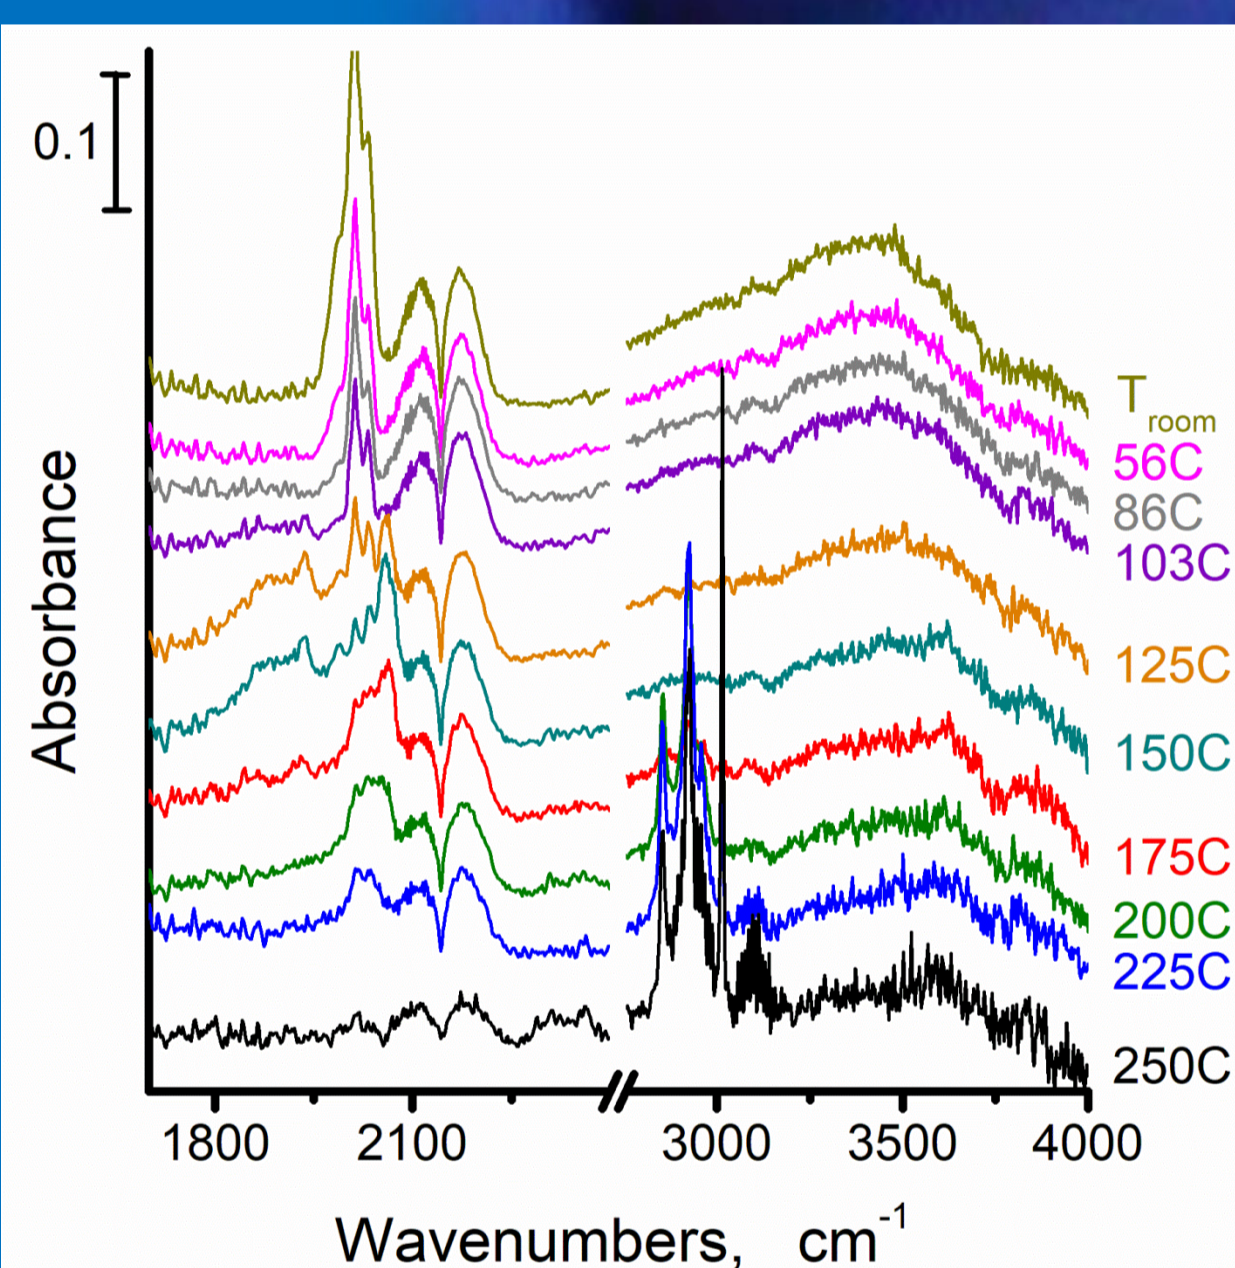

**Bands characteristic of CH<sub>x</sub> groups:** increase in intensity at T<sub>reac</sub> ≥ 175 °C for CoPdA and 150 °C for CoPdT. This mainly concerned the band of CH<sub>2</sub> groups at 2926 cm<sup>-1</sup>. I<sub>CH<sub>2</sub></sub>/I<sub>CH<sub>3</sub></sub> = 1.2-2 for CoPdT in the interval 175-250 °C - steady adsorption of CH<sub>x</sub> intermediates. CH<sub>4</sub> became perceptible in spectra at 200 °C (CoPdT) and 225 °C (CoPdA). The intensity increased with T<sub>reac</sub> much more significantly with CoPdT within 225-250 °C (a 3.7-fold increase of the 3015 cm<sup>-1</sup> band). **Registered particularity showed that both systems have potential to produce higher hydrocarbons than CH<sub>4</sub> even at 1 atm.**

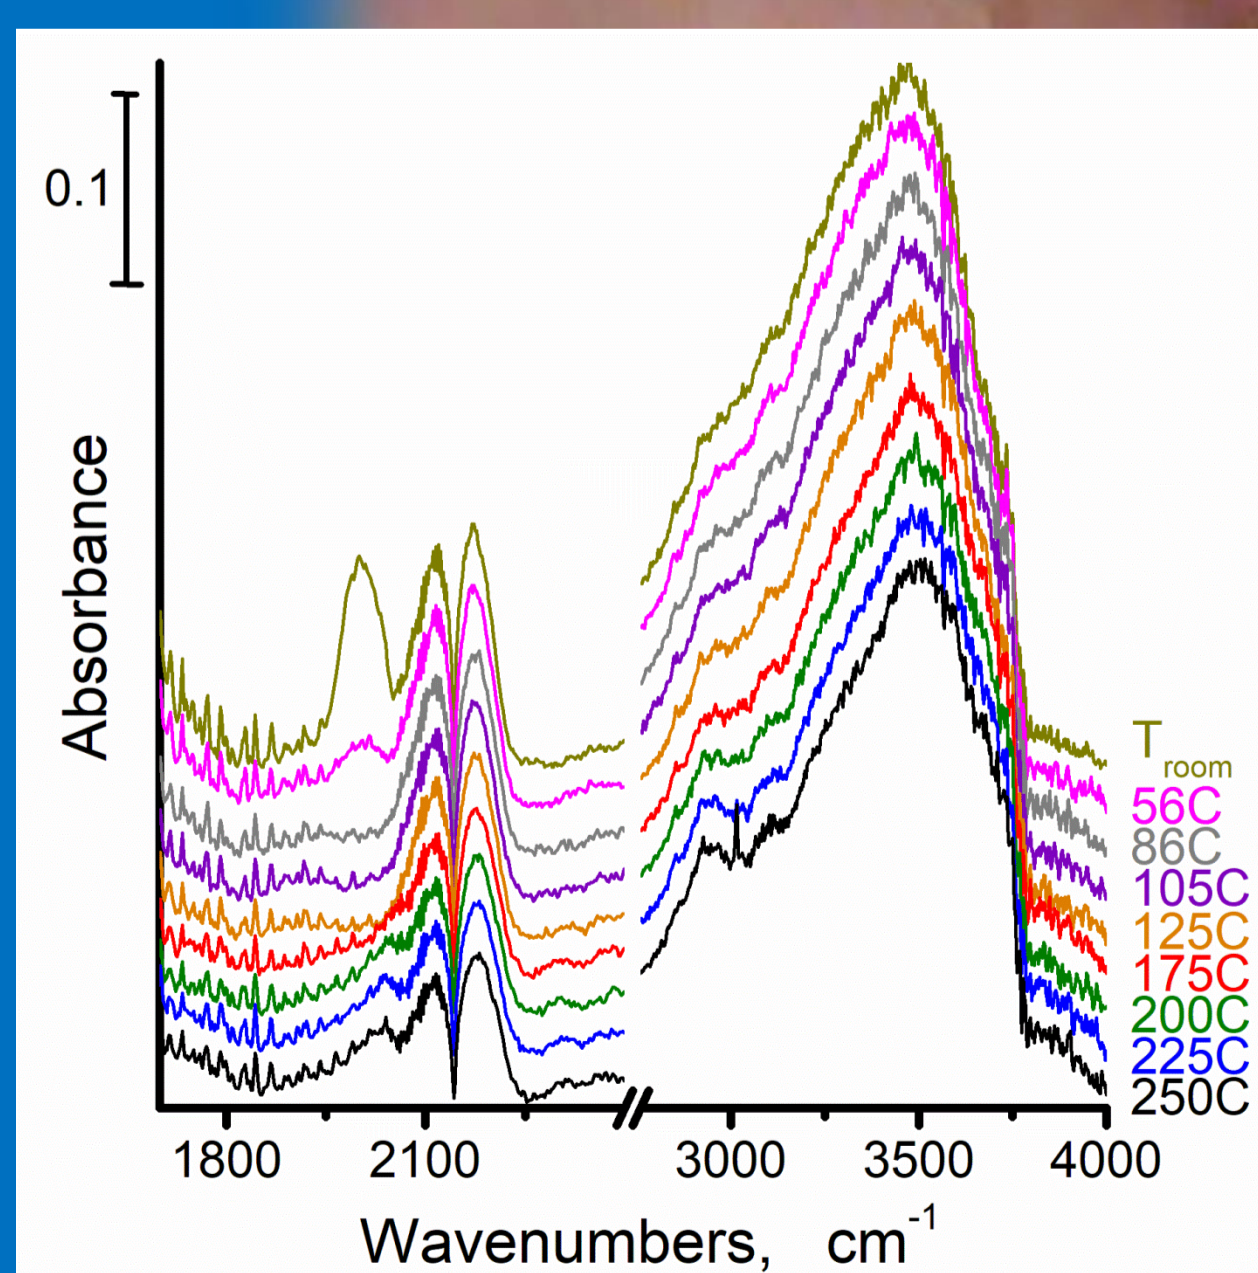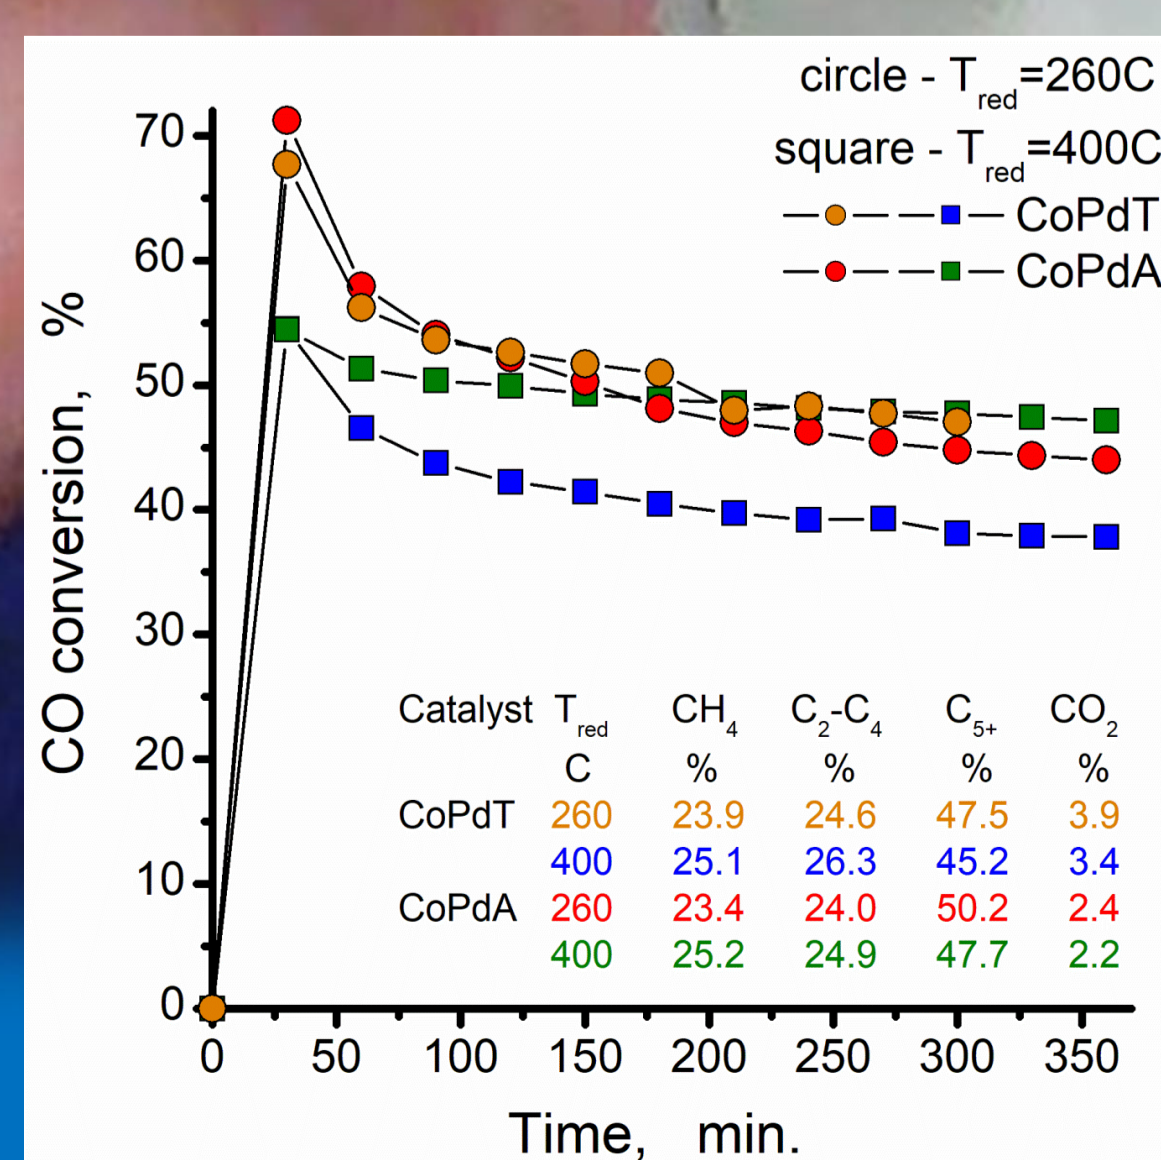

CO conversion and selectivity depended on T<sub>red</sub>; CH<sub>4</sub> is the main product; CH<sub>4</sub>/CO<sub>2</sub> - CoPdA > CoPdT; CO conversion decreased carbon deposition on the surface, difficult diffusion due to C<sub>5+</sub> hydrocarbon synthesis, consumption of reagent in oxide phase reduction, particle agglomeration. Reduction at 400 C - **CoPdT preserved higher CO<sub>2</sub> production - SMSI provides active sites.** CoPdA - stable CO conversion. The modified properties and larger particle size favour CO dissociation over Co. Higher total pressure and increased P<sub>H<sub>2</sub></sub> enriched formation of shorter C<sub>x</sub>H<sub>y</sub> fragments and decreased their combination.

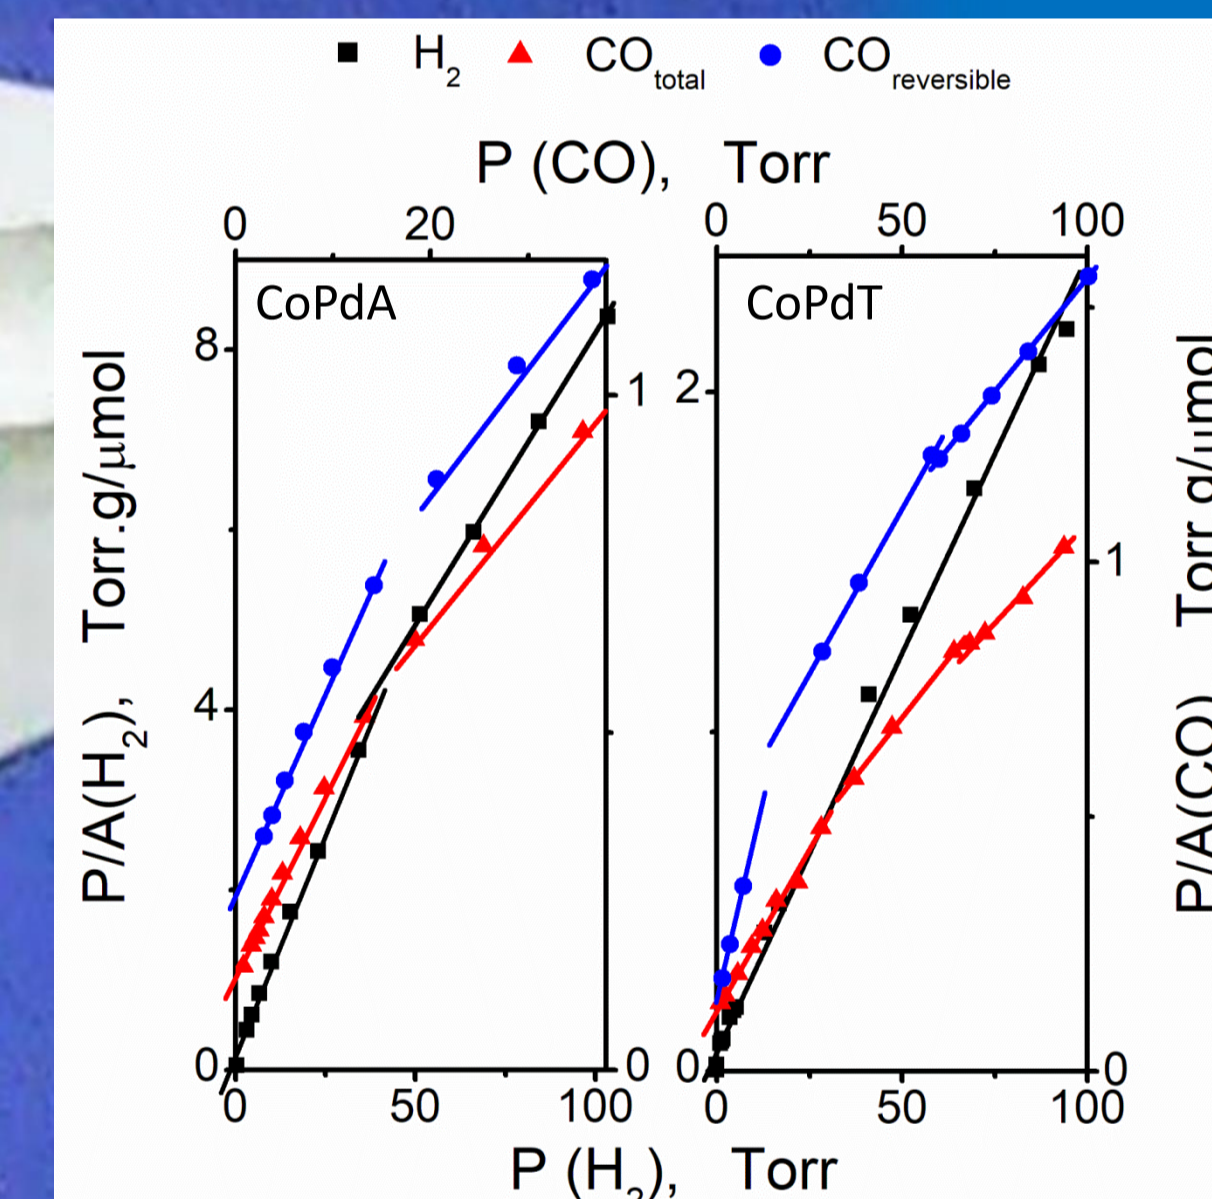

**H<sub>2</sub> and CO adsorption:** higher diversity of adsorbed H<sub>2</sub> and CO species on CoPdT. **H<sub>2</sub> desorption:** opposite situation; high temperature H<sub>2</sub> (T > 360 °C, CoPdA) - less reactive and a low mobile form; **CO desorption:** T<sub>des</sub> ≤ 200 °C - linear and bridge species - an increase at the expense of high temperature species with CoPdT, with CoPdA only alternate their quotas; linear CO species prevail over bridge ones depending on T<sub>ads</sub> and support; bridge species increase with T<sub>ads</sub>.

T<sub>des</sub> ≥ 200 °C - carbonate(-like) species - a significant amount with CoPdT; common temperature intervals - favour interaction/decomposition facilitating formation of hydrocarbons and CO<sub>2</sub>; high temperature region - CoPdA catalyst shows negligible desorption

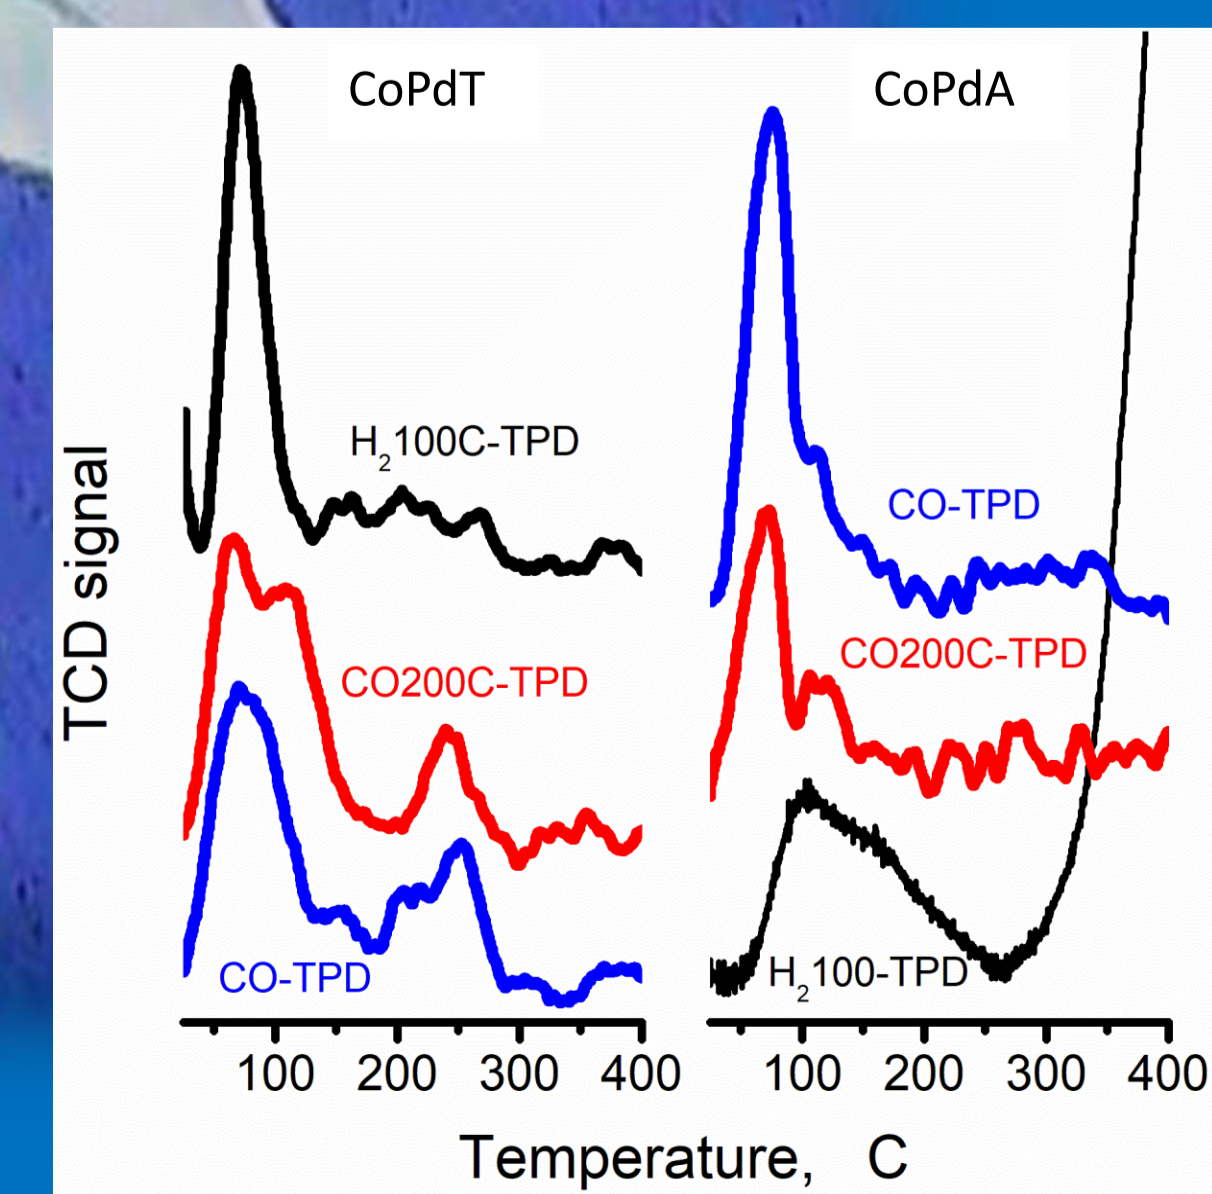

This research was supported by Bulgarian National Science Fund through contract KP-06-H29-9/2018.
